# Supplementary material for: ClueNet: Clustering a temporal network based on topological similarity rather than denseness
Source: PubMed Central journal article supplement (PMC5940177; doi:10.1371/journal.pone.0195993), 2018-05-08
Supplement: pone.0195993.s005.pdf [file pone.0195993.s005.pdf]

**Table S1. Node labels for the Enron network.**

| <b>Label</b>      | <b>Employee</b> | <b>VP</b> | <b>Manager</b> | <b>CEO</b> | <b>Director</b> | <b>President</b> | <b>Managing Director</b> |
|-------------------|-----------------|-----------|----------------|------------|-----------------|------------------|--------------------------|
| <b>Percentage</b> | 58.2%           | 16.5%     | 8.8%           | 2.7%       | 7.7%            | 2.7%             | 3.3%                     |

The percentage of nodes in the network that have the given label.
