# Supplementary material for: ClueNet: Clustering a temporal network based on topological similarity rather than denseness
Source: PubMed Central journal article supplement (PMC5940177; doi:10.1371/journal.pone.0195993), 2018-05-08
Supplement: pone.0195993.s006.pdf [file pone.0195993.s006.pdf]

**Table S2. Node labels for the hospital network.**

| <b>Label</b>      | <b>Doctor</b> | <b>Administrator</b> | <b>Nurse</b> | <b>Patient</b> |
|-------------------|---------------|----------------------|--------------|----------------|
| <b>Percentage</b> | 14.7%         | 10.7%                | 36.0%        | 38.7%          |

The percentage of nodes in the network that have the given label.
