# Supplementary material for: ClueNet: Clustering a temporal network based on topological similarity rather than denseness
Source: PubMed Central journal article supplement (PMC5940177; doi:10.1371/journal.pone.0195993), 2018-05-08
Supplement: pone.0195993.s007.pdf [file pone.0195993.s007.pdf]

**Table S3. Node labels for the high school network.**

| <b>Label</b>      | <b>2BIO1</b> | <b>2BIO2</b> | <b>2BIO3</b> | <b>PC</b> | <b>PC*</b> | <b>PSI*</b> | <b>MP</b> | <b>MP*1</b> | <b>MP*2</b> |
|-------------------|--------------|--------------|--------------|-----------|------------|-------------|-----------|-------------|-------------|
| <b>Percentage</b> | 11.3%        | 10.0%        | 12.2%        | 13.5%     | 12.0%      | 10.4%       | 10.1%     | 8.9%        | 11.6%       |

The percentage of nodes in the network that have the given label.
