# Supplementary material for: ClueNet: Clustering a temporal network based on topological similarity rather than denseness
Source: PubMed Central journal article supplement (PMC5940177; doi:10.1371/journal.pone.0195993), 2018-05-08
Supplement: pone.0195993.s008.pdf [file pone.0195993.s008.pdf]

Table S4. The network construction parameters used by each method

|                             | Enron    |    |         | Hospital |    |                      | High school |    |                     |
|-----------------------------|----------|----|---------|----------|----|----------------------|-------------|----|---------------------|
|                             | tw       | w  | Method  | tw       | w  | Method               | tw          | w  | Method              |
| <b>C-ST</b>                 | 3 months | 2  | K-Means | 500      | 16 | Label Propagation    | 200         | 1  | Simulated Annealing |
| <b>C-D</b>                  | 3 months | 8  | K-Means | 50       | 2  | Hierarchical Infomap | 100         | 1  | Simulaed Annealing  |
| <b>C-C</b>                  | 2 months | 2  | K-Means | 50       | 1  | K-Means              | 200         | 1  | Simulated Annealing |
| <b>Louvain</b>              | 1 month  | 2  | -       | -        | -  | -                    | 200         | 16 | -                   |
| <b>Infomap</b>              | 2 weeks  | 8  | -       | 300      | 2  | -                    | 200         | 16 | -                   |
| <b>Hierarchical Infomap</b> | 2 weeks  | 8  | -       | 300      | 2  | -                    | 200         | 2  | -                   |
| <b>Label Propagation</b>    | 3 months | 16 | -       | 300      | 8  | -                    | 200         | 16 | -                   |
| <b>Simulated Annealing</b>  | 1 month  | 16 | -       | 100      | 1  | -                    | 200         | 1  | -                   |
| <b>Multistep</b>            | 2 months | 2  | -       | 300      | 8  | -                    | 100         | 1  | -                   |

The “method” column displays the clustering algorithm (k-medoids or an existing denseness-based method) used by the given version of ClueNet.
