# Supplementary material for: ClueNet: Clustering a temporal network based on topological similarity rather than denseness
Source: PubMed Central journal article supplement (PMC5940177; doi:10.1371/journal.pone.0195993), 2018-05-08
Supplement: pone.0195993.s010.pdf [file pone.0195993.s010.pdf]

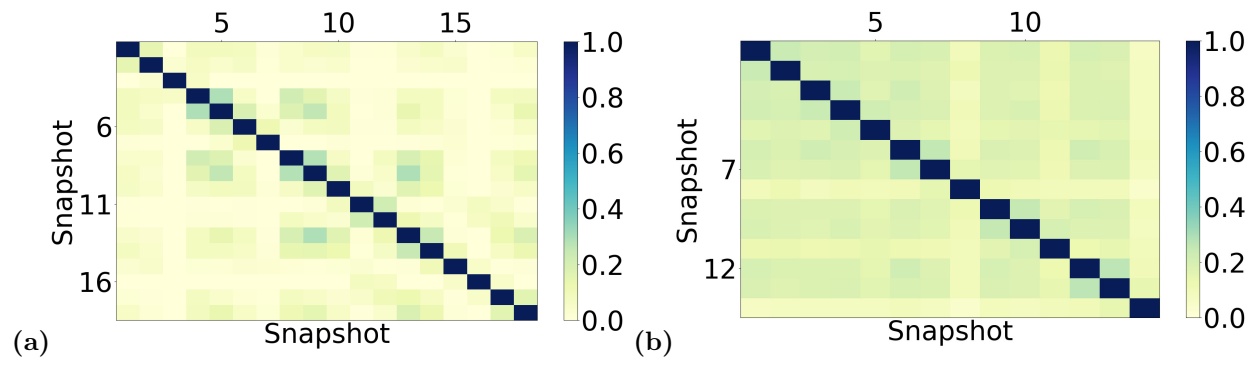

**Fig S1. Pairwise edge overlaps between the snapshots of social (a) hospital and (b) high school dynamic networks.** The darker the color, the higher the edge overlap between the given snapshots. For the hospital data, the following network construction parameter values are used:  $t_w=300$  seconds and  $w=1$ . For the high school data, the parameter values are:  $t_w=200$  seconds and  $w=1$ .
