# Supplementary material for: ClueNet: Clustering a temporal network based on topological similarity rather than denseness
Source: PubMed Central journal article supplement (PMC5940177; doi:10.1371/journal.pone.0195993), 2018-05-08
Supplement: pone.0195993.s016.pdf [file pone.0195993.s016.pdf]

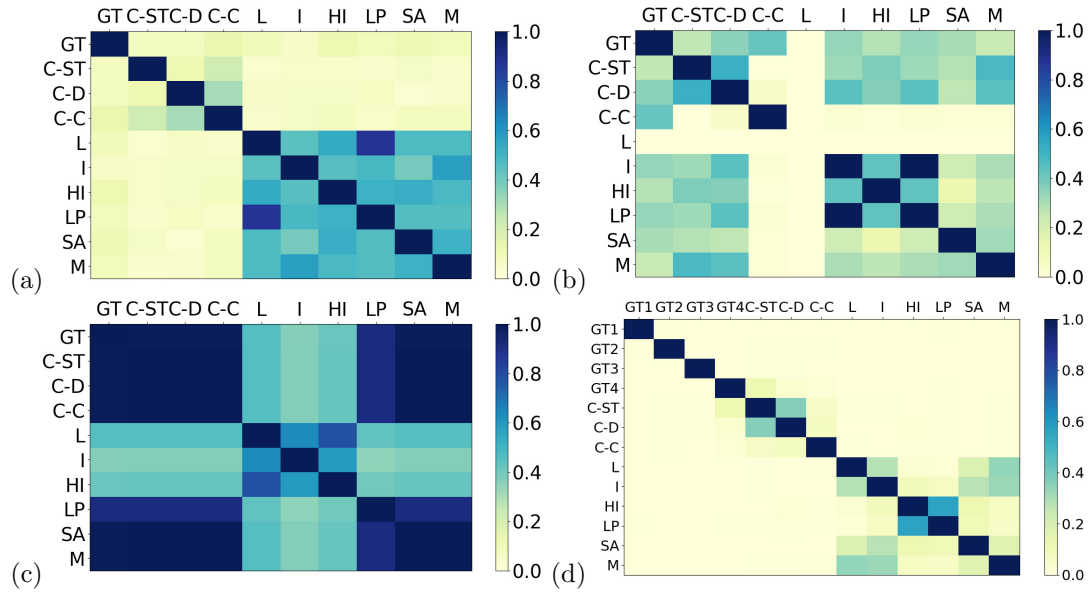

**Fig S7. Pairwise partition similarities in terms of AMI.** Pairwise similarities in terms of AMI between different partitions (ground truth (GT), ClueNet (its three versions: C-ST, C-D, and C-C), Louvain (L), Infomap (I), Hierarchical Infomap (HI), label propagation (LP), simulated annealing (SA), and Multistep (M)), for **(a)** social Enron, **(b)** social hospital, **(c)** social high school, and **(d)** biological aging-related dynamic networks. Note that in panel (d), there are four ground truth partitions, depending on which aging-related ground truth data is considered (BE2004, BE2008, AD, or SequenceAge, which are labeled as GT1, GT2, GT3, and GT4 respectively; Section Data).
