# Supplementary material for: ClueNet: Clustering a temporal network based on topological similarity rather than denseness
Source: PubMed Central journal article supplement (PMC5940177; doi:10.1371/journal.pone.0195993), 2018-05-08
Supplement: pone.0195993.s017.pdf [file pone.0195993.s017.pdf]

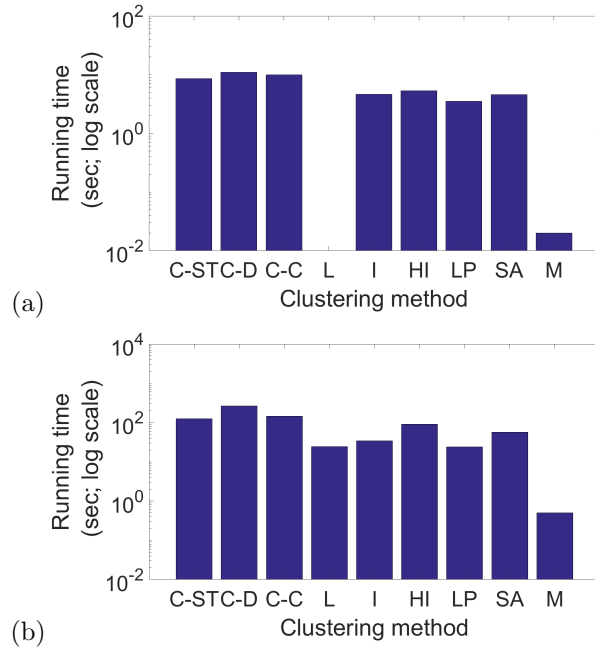

**Fig S8. Running time comparison.** Running time comparison of the different methods (ClueNet (its three versions: C-ST, C-D, C-C), Louvain (L), Infomap (I), Hierarchical Infomap (HI), label propagation (LP), simulated annealing (SA), and Multistep (M)) for the social **(a)** hospital and **(b)** high school dynamic networks.
