# Supplementary material for: ClueNet: Clustering a temporal network based on topological similarity rather than denseness
Source: PLOS journal article supplement (doi:10.1371/journal.pone.0195993), 2018-05-08
Supplement: S9 (10.1371/journal.pone.0195993.s009) [file journal.pone.0195993.s009]

Table S5. Results when ClueNet’s dynamic graphlet-based topological similarities are used on top of the existing denseness-based methods.

| <b>C-ST</b>                |                  |               |            |                    |
|----------------------------|------------------|---------------|------------|--------------------|
| <b>Method</b>              | <b>Precision</b> | <b>Recall</b> | <b>AMI</b> |                    |
| <b>Simulated Annealing</b> | 96.68%           | 93.89%        | 0.9372     | <b>High School</b> |
| <b>ClueNet</b>             | 17.10%           | 35.98%        | 0.1752     |                    |
| <b>Combined</b>            | 99.44%           | 99.39%        | 0.9933     |                    |
| <b>Label Propagation</b>   | 42.62%           | 90.55%        | 0.2851     | <b>Hospital</b>    |
| <b>ClueNet</b>             | 45.15%           | 45.48%        | 0.2249     |                    |
| <b>Combined</b>            | 43.32%           | 65.26%        | 0.258      |                    |
| <b>C-D</b>                 |                  |               |            |                    |
| <b>Method</b>              | <b>Precision</b> | <b>Recall</b> | <b>AMI</b> |                    |
| <b>Simulated Annealing</b> | 96.68%           | 93.89%        | 0.9372     | <b>High School</b> |
| <b>ClueNet</b>             | 14.73%           | 37.27%        | 0.1467     |                    |
| <b>Combined</b>            | 99.44%           | 99.39%        | 0.9933     |                    |
| <b>Hi. Infomap</b>         | 43.79%           | 91.57%        | 0.3389     | <b>Hospital</b>    |
| <b>ClueNet</b>             | 50.96%           | 69.40%        | 0.2698     |                    |
| <b>Combined</b>            | 42.91%           | 69.88%        | 0.3528     |                    |
| <b>C-C</b>                 |                  |               |            |                    |
| <b>Method</b>              | <b>Precision</b> | <b>Recall</b> | <b>AMI</b> |                    |
| <b>Simulated Annealing</b> | 96.68%           | 93.89%        | 0.9372     | <b>High School</b> |
| <b>ClueNet</b>             | 12.25%           | 62.40%        | 0.0795     |                    |
| <b>Combined</b>            | 99.44%           | 99.39%        | 0.9933     |                    |

Partition quality results of the given denseness-based methods, ClueNet, and when combining ClueNet’s graphlet-based topological similarities with denseness-based methods, for the three versions of ClueNet, for the high school and hospital datasets.
